# Supplementary material for: Serum Interleukin-6 and CCL11/Eotaxin May Be Suitable Biomarkers for the Diagnosis of Chronic Nonbacterial Osteomyelitis
Source: Front Pediatr. 2017 Dec 1;5:256. doi: 10.3389/fped.2017.00256 (PMC5716982; doi:10.3389/fped.2017.00256)
Supplement: Data Supplement S3 — Standardized canonical discriminant analysis. [file table_3.xlsx]

## Sheet: Tabelle1
USE ALL.
COMPUTE filter_$=(Erkrankung ~= 14 & Erkrankung ~= 6).
FILTER BY filter_$.
EXECUTE.
DISCRIMINANT
/GROUPS=CRMO_Gruppe(0 2)
/VARIABLES=CCL11_Eotaxin CCL2_MCP_1 CCL5_RANTES Collagen_I_alpha_1 IL_10 IL_12_p70 IL_18 IL_1ra
IL_2_R_alpha IL_6 Mip_1_beta Osteopontin Osteoprogerin S100A8 SPARC TNF_alpha TRANCE_RANK_L
/ANALYSIS ALL
/METHOD=WILKS
/PIN=.05
/POUT=.10
/PRIORS EQUAL
/HISTORY
/STATISTICS=COEFF RAW TABLE
/PLOT=COMBINED MAP
/CLASSIFY=NONMISSING POOLED.
Discriminant
Notes
Output Created		21-APR-2017 11:20:27
Comments
Input	Data	U:\_Beratung\Kubasch\Hedrich_170403_English_diskr.sav
	Active Dataset	DataSet1
	Filter	filter_$
	Weight	<none>
	Split File	<none>
	N of Rows in Working Data File	253
Missing Value Handling	Definition of Missing	User-defined missing values are treated as missing in the analysis phase.
	Cases Used	In the analysis phase, cases with no user- or system-missing values for any predictor variable are used. Cases with user-, system-missing, or out-of-range values for the grouping variable are always excluded.
Syntax		DISCRIMINANT /GROUPS=CRMO_Gruppe(0 2) /VARIABLES=CCL11_Eotaxin CCL2_MCP_1 CCL5_RANTES Collagen_I_alpha_1 IL_10 IL_12_p70 IL_18 IL_1ra IL_2_R_alpha IL_6 Mip_1_beta Osteopontin Osteoprogerin S100A8 SPARC TNF_alpha TRANCE_RANK_L /ANALYSIS ALL /METHOD=WILKS /PIN=.05 /POUT=.10 /PRIORS EQUAL /HISTORY /STATISTICS=COEFF RAW TABLE /PLOT=COMBINED MAP /CLASSIFY=NONMISSING POOLED.
Resources	Processor Time	00:00:00,19
	Elapsed Time	00:00:00,13
Analysis Case Processing Summary
Unweighted Cases		N	Percent
Valid		253	100
Excluded	Missing or out-of-range group codes	0	0
	At least one missing discriminating variable	0	0
	Both missing or out-of-range group codes and at least one missing discriminating variable	0	0
	Total	0	0
Total		253	100
Group Statistics
CRMO_Gruppe		Valid N (listwise)
		Unweighted	Weighted
0 Disease Control	CCL11_Eotaxin	123	123
	CCL2_MCP_1	123	123
	CCL5_RANTES	123	123
	Collagen_I_alpha_1	123	123
	IL_10	123	123
	IL_12_p70	123	123
	IL_18	123	123
	IL_1ra	123	123
	IL_2_R_alpha	123	123
	IL_6	123	123
	Mip_1_beta	123	123
	Osteopontin	123	123
	Osteoprogerin	123	123
	S100A8	123	123
	SPARC	123	123
	TNF_alpha	123	123
	TRANCE_RANK_L	123	123
1 CRMO	CCL11_Eotaxin	71	71
	CCL2_MCP_1	71	71
	CCL5_RANTES	71	71
	Collagen_I_alpha_1	71	71
	IL_10	71	71
	IL_12_p70	71	71
	IL_18	71	71
	IL_1ra	71	71
	IL_2_R_alpha	71	71
	IL_6	71	71
	Mip_1_beta	71	71
	Osteopontin	71	71
	Osteoprogerin	71	71
	S100A8	71	71
	SPARC	71	71
	TNF_alpha	71	71
	TRANCE_RANK_L	71	71
2 Healthy	CCL11_Eotaxin	59	59
	CCL2_MCP_1	59	59
	CCL5_RANTES	59	59
	Collagen_I_alpha_1	59	59
	IL_10	59	59
	IL_12_p70	59	59
	IL_18	59	59
	IL_1ra	59	59
	IL_2_R_alpha	59	59
	IL_6	59	59
	Mip_1_beta	59	59
	Osteopontin	59	59
	Osteoprogerin	59	59
	S100A8	59	59
	SPARC	59	59
	TNF_alpha	59	59
	TRANCE_RANK_L	59	59
Total	CCL11_Eotaxin	253	253
	CCL2_MCP_1	253	253
	CCL5_RANTES	253	253
	Collagen_I_alpha_1	253	253
	IL_10	253	253
	IL_12_p70	253	253
	IL_18	253	253
	IL_1ra	253	253
	IL_2_R_alpha	253	253
	IL_6	253	253
	Mip_1_beta	253	253
	Osteopontin	253	253
	Osteoprogerin	253	253
	S100A8	253	253
	SPARC	253	253
	TNF_alpha	253	253
	TRANCE_RANK_L	253	253
Analysis 1
Stepwise Statistics
Variables Entered/Removeda,b,c,d
Step	Entered	Wilks' Lambda
		Statistic	df1	df2	df3	Exact F
						Statistic	df1	df2	Sig.
1	CCL11_Eotaxin	0.422985	1	2	250	170.519	2	250	1.95265e-47
2	CCL5_RANTES	0.23907	2	2	250	130.128	4	498	5.42643e-76
3	IL_6	0.143136	3	2	250	135.836	6	496	2.48443e-101
4	Collagen_I_alpha_1	0.118884	4	2	250	117.342	8	494	4.3658e-109
5	IL_2_R_alpha	0.10123	5	2	250	105.436	10	492	1.55651e-115
6	Osteoprogerin	0.0976859	6	2	250	89.8135	12	490	2.17602e-115
7	TNF_alpha	0.09431	7	2	250	78.6473	14	488	2.81098e-115
8	S100A8	0.0916107	8	2	250	69.981	16	486	6.79669e-115
9	IL_10	0.0890902	9	2	250	63.1972	18	484	1.70901e-114
At each step, the variable that minimizes the overall Wilks' Lambda is entered.
a. Maximum number of steps is 34.
b. Maximum significance of F to enter is .05.
c. Minimum significance of F to remove is .10.
d. F level, tolerance, or VIN insufficient for further computation.
Variables in the Analysis
Step		Tolerance	Sig. of F to Remove	Wilks' Lambda
1	CCL11_Eotaxin	1	1.95265e-47
2	CCL11_Eotaxin	0.62476	2.20053e-71	0.883193
	CCL5_RANTES	0.62476	1.40925e-31	0.422985
3	CCL11_Eotaxin	0.6246	7.2995e-68	0.497937
	CCL5_RANTES	0.617916	2.48923e-31	0.252671
	IL_6	0.979011	2.37515e-28	0.23907
4	CCL11_Eotaxin	0.602171	2.51375e-65	0.396458
	CCL5_RANTES	0.61058	2.23021e-30	0.206642
	IL_6	0.948343	1.19361e-28	0.200088
	Collagen_I_alpha_1	0.935673	1.10337e-10	0.143136
5	CCL11_Eotaxin	0.590981	5.92838e-64	0.330636
	CCL5_RANTES	0.598142	2.33907e-31	0.179615
	IL_6	0.92999	1.6166e-29	0.173535
	Collagen_I_alpha_1	0.934446	6.31876e-10	0.120254
	IL_2_R_alpha	0.955781	2.58769e-09	0.118884
6	CCL11_Eotaxin	0.590916	9.85487e-60	0.296153
	CCL5_RANTES	0.593867	1.79194e-31	0.174111
	IL_6	0.897836	1.33363e-29	0.168091
	Collagen_I_alpha_1	0.933815	7.32484e-10	0.115986
	IL_2_R_alpha	0.78	2.28796e-09	0.114912
	Osteoprogerin	0.767827	0.0127046	0.10123
7	CCL11_Eotaxin	0.553176	3.56272e-61	0.295145
	CCL5_RANTES	0.491344	4.62461e-17	0.128366
	IL_6	0.877571	2.09553e-29	0.162043
	Collagen_I_alpha_1	0.915055	2.71033e-08	0.108788
	IL_2_R_alpha	0.707137	1.12989e-06	0.105512
	Osteoprogerin	0.739697	0.00302743	0.0989019
	TNF_alpha	0.495008	0.0136955	0.0976859
8	CCL11_Eotaxin	0.552475	1.76994e-60	0.284271
	CCL5_RANTES	0.093788	1.69427e-06	0.102198
	IL_6	0.849582	5.02006e-30	0.159622
	Collagen_I_alpha_1	0.799961	1.85507e-09	0.108096
	IL_2_R_alpha	0.702141	6.40705e-06	0.101086
	Osteoprogerin	0.739592	0.00328187	0.0960262
	TNF_alpha	0.467519	0.00605323	0.0955436
	S100A8	0.0902186	0.0293558	0.09431
9	CCL11_Eotaxin	0.551893	5.5203e-59	0.269961
	CCL5_RANTES	0.0937731	1.84074e-06	0.0993635
	IL_6	0.837391	1.3144e-30	0.15732
	Collagen_I_alpha_1	0.798501	1.62549e-09	0.105309
	IL_2_R_alpha	0.562519	0.0048985	0.0930937
	Osteoprogerin	0.739331	0.00339975	0.0933752
	TNF_alpha	0.462837	0.00457306	0.0931467
	S100A8	0.0722176	0.0022545	0.0936927
	IL_10	0.29737	0.0341945	0.0916107
Variables Not in the Analysis
Step		Tolerance	Min. Tolerance	Sig. of F to Enter	Wilks' Lambda
0	CCL11_Eotaxin	1	1	1.95265e-47	0.422985
	CCL2_MCP_1	1	1	0.178462	0.986308
	CCL5_RANTES	1	1	1.80697e-07	0.883193
	Collagen_I_alpha_1	1	1	5.30864e-15	0.768776
	IL_10	1	1	1.48356e-11	0.819163
	IL_12_p70	1	1	0.226703	0.988197
	IL_18	1	1	3.93283e-07	0.888705
	IL_1ra	1	1	0.00378035	0.956357
	IL_2_R_alpha	1	1	5.16865e-11	0.827384
	IL_6	1	1	5.19601e-31	0.572434
	Mip_1_beta	1	1	4.55395e-08	0.873508
	Osteopontin	1	1	0.95104	0.999598
	Osteoprogerin	1	1	0.152403	0.985063
	S100A8	1	1	3.00262e-06	0.903275
	SPARC	1	1	0.000218087	0.934779
	TNF_alpha	1	1	0.00025464	0.935939
	TRANCE_RANK_L	1	1	0.0093139	0.963281
1	CCL2_MCP_1	0.999296	0.999296	0.212948	0.417763
	CCL5_RANTES	0.62476	0.62476	1.40925e-31	0.23907
	Collagen_I_alpha_1	0.981537	0.981537	2.81043e-11	0.347998
	IL_10	0.780737	0.780737	8.93012e-25	0.271119
	IL_12_p70	0.906659	0.906659	1.65211e-05	0.387182
	IL_18	0.9999	0.9999	2.12843e-05	0.387971
	IL_1ra	0.998892	0.998892	0.00827469	0.407005
	IL_2_R_alpha	0.998094	0.998094	6.66865e-08	0.370413
	IL_6	0.989854	0.989854	1.38239e-28	0.252671
	Mip_1_beta	0.831003	0.831003	5.00658e-18	0.307161
	Osteopontin	0.999881	0.999881	0.955584	0.422831
	Osteoprogerin	0.994336	0.994336	0.715726	0.42185
	S100A8	0.636043	0.636043	4.98135e-29	0.250608
	SPARC	0.986913	0.986913	0.000247575	0.395693
	TNF_alpha	0.705143	0.705143	6.09468e-22	0.285708
	TRANCE_RANK_L	0.90397	0.90397	6.4064e-08	0.370294
2	CCL2_MCP_1	0.997686	0.623753	0.280466	0.236632
	Collagen_I_alpha_1	0.965931	0.60362	2.5959e-10	0.200088
	IL_10	0.466188	0.373052	5.62227e-05	0.220928
	IL_12_p70	0.902335	0.574236	4.4322e-05	0.220505
	IL_18	0.971536	0.607038	9.64545e-07	0.213802
	IL_1ra	0.989242	0.618724	0.00281918	0.228014
	IL_2_R_alpha	0.974771	0.610161	3.94044e-09	0.204526
	IL_6	0.979011	0.617916	2.37515e-28	0.143136
	Mip_1_beta	0.573231	0.430963	0.00709886	0.229719
	Osteopontin	0.997995	0.623582	0.855722	0.23877
	Osteoprogerin	0.994239	0.622074	0.773731	0.238576
	S100A8	0.113517	0.111503	0.597142	0.238078
	SPARC	0.95827	0.606628	0.084686	0.234358
	TNF_alpha	0.622333	0.55139	7.24404e-08	0.209385
	TRANCE_RANK_L	0.890946	0.60399	0.000305891	0.223967
3	CCL2_MCP_1	0.972927	0.615905	0.0214987	0.138754
	Collagen_I_alpha_1	0.935673	0.602171	1.10337e-10	0.118884
	IL_10	0.461285	0.365141	1.62243e-05	0.130908
	IL_12_p70	0.902324	0.574118	5.46527e-05	0.132201
	IL_18	0.970667	0.601176	2.521e-06	0.128949
	IL_1ra	0.934847	0.614387	0.154193	0.140986
	IL_2_R_alpha	0.957037	0.605871	4.54454e-10	0.120254
	Mip_1_beta	0.555367	0.416147	0.000220003	0.133701
	Osteopontin	0.99636	0.616977	0.952262	0.143079
	Osteoprogerin	0.940924	0.617781	0.0143807	0.138303
	S100A8	0.111725	0.11096	0.248	0.141529
	SPARC	0.95314	0.601593	0.219309	0.141388
	TNF_alpha	0.62179	0.547077	1.89535e-07	0.126275
	TRANCE_RANK_L	0.888748	0.603963	0.00108547	0.13544
4	CCL2_MCP_1	0.972605	0.602159	0.0277566	0.11547
	IL_10	0.456401	0.357014	0.000600338	0.111926
	IL_12_p70	0.889277	0.561162	0.00401762	0.113669
	IL_18	0.968018	0.593075	3.90029e-06	0.107436
	IL_1ra	0.933525	0.59635	0.134776	0.116963
	IL_2_R_alpha	0.955781	0.590981	2.58769e-09	0.10123
	Mip_1_beta	0.528927	0.396945	0.00618459	0.114069
	Osteopontin	0.990987	0.602159	0.982054	0.118866
	Osteoprogerin	0.940864	0.599355	0.0153092	0.114912
	S100A8	0.0958658	0.0944189	0.0523006	0.116066
	SPARC	0.953067	0.594454	0.310476	0.117759
	TNF_alpha	0.613143	0.535953	6.09303e-05	0.109864
	TRANCE_RANK_L	0.815387	0.591759	0.2587	0.117584
5	CCL2_MCP_1	0.959834	0.590739	0.094459	0.0992988
	IL_10	0.371612	0.301298	0.448701	0.10057
	IL_12_p70	0.835003	0.558382	0.133679	0.0995807
	IL_18	0.594044	0.586535	0.434842	0.100544
	IL_1ra	0.912622	0.587374	0.458335	0.100587
	Mip_1_beta	0.515081	0.379438	0.0497264	0.0987801
	Osteopontin	0.939781	0.590539	0.290511	0.100214
	Osteoprogerin	0.767827	0.590916	0.0127046	0.0976859
	S100A8	0.0958418	0.0939418	0.0640659	0.0989846
	SPARC	0.94343	0.585078	0.134268	0.0995843
	TNF_alpha	0.513833	0.491353	0.0578298	0.0989019
	TRANCE_RANK_L	0.815238	0.581222	0.35432	0.100376
6	CCL2_MCP_1	0.957257	0.590159	0.0802054	0.0956863
	IL_10	0.371584	0.299979	0.448169	0.0970453
	IL_12_p70	0.82927	0.558333	0.0875497	0.095755
	IL_18	0.590598	0.53035	0.353134	0.0968559
	IL_1ra	0.883339	0.587366	0.209142	0.096441
	Mip_1_beta	0.50917	0.379435	0.0714419	0.0955956
	Osteopontin	0.939762	0.590476	0.291935	0.096705
	S100A8	0.0955234	0.0939067	0.0668509	0.0955436
	SPARC	0.942316	0.580475	0.156996	0.0962145
	TNF_alpha	0.495008	0.491344	0.0136955	0.09431
	TRANCE_RANK_L	0.812718	0.581207	0.308901	0.0967498
7	CCL2_MCP_1	0.957181	0.489056	0.0803307	0.0923729
	IL_10	0.371492	0.273115	0.450277	0.0936927
	IL_12_p70	0.814322	0.486085	0.198985	0.0930651
	IL_18	0.589402	0.488092	0.306745	0.0933972
	IL_1ra	0.881439	0.490206	0.174202	0.0929632
	Mip_1_beta	0.50621	0.344141	0.0623731	0.0921807
	Osteopontin	0.921549	0.485415	0.401634	0.0936046
	S100A8	0.0902186	0.0902186	0.0293558	0.0916107
	SPARC	0.942025	0.481162	0.152377	0.0928609
	TRANCE_RANK_L	0.791912	0.482336	0.492598	0.093762
8	CCL2_MCP_1	0.956716	0.0901748	0.0888384	0.089796
	IL_10	0.29737	0.0722176	0.0341945	0.0890902
	IL_12_p70	0.788527	0.0873608	0.107786	0.0899396
	IL_18	0.581829	0.0890593	0.204061	0.0904153
	IL_1ra	0.880006	0.0900719	0.190295	0.0903631
	Mip_1_beta	0.498429	0.0888318	0.0360601	0.0891294
	Osteopontin	0.892752	0.0873994	0.191642	0.0903683
	SPARC	0.923096	0.0884057	0.284413	0.0906637
	TRANCE_RANK_L	0.769323	0.0876451	0.264217	0.0906085
9	CCL2_MCP_1	0.956213	0.0722111	0.0844755	0.0872817
	IL_12_p70	0.785566	0.0697128	0.092477	0.0873473
	IL_18	0.378238	0.0694102	0.287314	0.0881729
	IL_1ra	0.873105	0.0718033	0.192161	0.0878791
	Mip_1_beta	0.497087	0.0716535	0.0517587	0.0869276
	Osteopontin	0.884246	0.0692978	0.123998	0.0875602
	SPARC	0.922253	0.0712801	0.264989	0.0881137
	TRANCE_RANK_L	0.76932	0.070577	0.275992	0.0881435
Wilks' Lambda
Step	Number of Variables	Lambda	df1	df2	df3	Exact F
						Statistic	df1	df2	Sig.
1	1	0.422985	1	2	250	170.519	2	250	1.95265e-47
2	2	0.23907	2	2	250	130.128	4	498	5.42643e-76
3	3	0.143136	3	2	250	135.836	6	496	2.48443e-101
4	4	0.118884	4	2	250	117.342	8	494	4.3658e-109
5	5	0.10123	5	2	250	105.436	10	492	1.55651e-115
6	6	0.0976859	6	2	250	89.8135	12	490	2.17602e-115
7	7	0.09431	7	2	250	78.6473	14	488	2.81098e-115
8	8	0.0916107	8	2	250	69.981	16	486	6.79669e-115
9	9	0.0890902	9	2	250	63.1972	18	484	1.70901e-114
Summary of Canonical Discriminant Functions
Eigenvalues
Function	Eigenvalue	% of Variance	Cumulative %	Canonical Correlation
1	4,721a	83.0699	83.0699	0.908403
2	,962a	16.9301	100	0.700245
a. First 2 canonical discriminant functions were used in the analysis.
Wilks' Lambda
Test of Function(s)	Wilks' Lambda	Chi-square	df	Sig.
1 through 2	0.0890902	594.854	18	1.053e-114
2	0.509657	165.808	8	9.74153e-32
Standardized Canonical Discriminant Function Coefficients
	Function
	1	2
CCL11_Eotaxin	-1.21075	0.0937478
CCL5_RANTES	1.11874	-0.377176
Collagen_I_alpha_1	0.42636	-0.295689
IL_10	0.120251	-0.405401
IL_2_R_alpha	0.254172	-0.217238
IL_6	0.112288	1.01736
Osteoprogerin	-0.260259	-0.112213
S100A8	-0.475812	1.0031
TNF_alpha	0.335123	-0.0537181
Structure Matrix
	Function
	1	2
CCL11_Eotaxin	-,536*	0.0882739
Collagen_I_alpha_1	,252*	-0.0422699
IL_10	,216*	-0.0108253
Mip_1_betab	,194*	0.150989
TNF_alpha	,118*	-0.0580369
IL_12_p70b	-,107*	-0.0574846
Osteoprogerin	-,054*	-0.0413726
SPARCb	,020*	-0.005045
IL_6	0.169088	,798*
IL_18b	0.0508735	-,317*
IL_2_R_alpha	0.16724	-,282*
CCL5_RANTES	0.148235	,172*
S100A8	0.132441	,159*
Osteopontinb	0.0761746	-,132*
CCL2_MCP_1b	0.0889474	,097*
IL_1rab	-0.0406514	,091*
TRANCE_RANK_Lb	0.00399897	-,021*
Pooled within-groups correlations between discriminating variables and standardized canonical discriminant functions Variables ordered by absolute size of correlation within function.
*. Largest absolute correlation between each variable and any discriminant function
b. This variable not used in the analysis.
Canonical Discriminant Function Coefficients
	Function
	1	2
CCL11_Eotaxin	-0.0245174	0.00189836
CCL5_RANTES	0.000625033	-0.000210725
Collagen_I_alpha_1	0.000402477	-0.000279125
IL_10	0.0234034	-0.0788999
IL_2_R_alpha	0.000533512	-0.000455985
IL_6	0.00653685	0.0592254
Osteoprogerin	-0.00114383	-0.000493169
S100A8	-0.000568351	0.00119819
TNF_alpha	0.0495701	-0.00794577
(Constant)	-2.26715	0.642314
Unstandardized coefficients
Functions at Group Centroids
CRMO_Gruppe	Function
	1	2
0 Disease Control	1.22022	-0.837462
1 CRMO	1.14017	1.47379
2 Healthy	-3.91592	-0.0276444
Unstandardized canonical discriminant functions evaluated at group means
Classification Statistics
Classification Processing Summary
Processed		253
Excluded	Missing or out-of-range group codes	0
	At least one missing discriminating variable	0
Used in Output		253
Prior Probabilities for Groups
CRMO_Gruppe	Prior	Cases Used in Analysis
		Unweighted	Weighted
0 Disease Control	0.333333	123	123
1 CRMO	0.333333	71	71
2 Healthy	0.333333	59	59
Total	1	253	253
Classification Function Coefficients
	CRMO_Gruppe
	0 Disease Control	1 CRMO	2 Healthy
CCL11_Eotaxin	-0.0469854	-0.040635	0.0804767
CCL5_RANTES	0.0051497	0.00461262	0.00176879
Collagen_I_alpha_1	0.00661341	0.00593606	0.00432019
IL_10	0.119573	-0.0646582	-0.0645252
IL_2_R_alpha	0.00327781	0.00218121	0.000168356
IL_6	-0.099334	0.0370273	-0.0849464
Osteoprogerin	0.0112702	0.010222	0.0167457
S100A8	-0.00571858	-0.00290378	-0.00182913
TNF_alpha	-0.277329	-0.299663	-0.538364
(Constant)	-29.8701	-28.8449	-24.278
Fisher's linear discriminant functions
Territorial Map
Canonical Discriminant
Function 2
-8,0 -6,0 -4,0 -2,0 ,0 2,0 4,0 6,0 8,0
+---------+---------+---------+---------+---------+---------+---------+---------+
8,0 + 32 +
I 32 I
I 32 I
I 32 I
I 32 I
I 32 I
6,0 + + + 32 + + + + + +
I 32 I
I 32 I
I 32 I
I 32 I
I 32 I
4,0 + + + 32+ + + + + +
I 32 I
I 32 I
I 32 I
I 32 I
I 32 I
2,0 + + + +32 + + + + +
I 32 I
I 32 * I
I 32 I
I 32 22222222I
I 322222222222222222222222222222222222222211111111I
,0 + + * + 311111111111111111111111111111111111111 +
I 31 I
I 31 I
I 31 * I
I 31 I
I 31 I
-2,0 + + + + 31 + + + + +
I 31 I
I 31 I
I 31 I
I 31 I
I 31 I
-4,0 + + + +31 + + + + +
I 31 I
I 31 I
I 31 I
I 31 I
I 31 I
-6,0 + + + 31 + + + + +
I 31 I
I 31 I
I 31 I
I 31 I
I 31 I
-8,0 + 31 +
+---------+---------+---------+---------+---------+---------+---------+---------+
-8,0 -6,0 -4,0 -2,0 ,0 2,0 4,0 6,0 8,0
Canonical Discriminant Function 1
Symbols used in territorial map
Symbol Group Label
------ ----- --------------------
1 0 Disease Control
2 1 CRMO
3 2 Healthy
* Indicates a group centroid
Classification Resultsa
CRMO_Gruppe			Predicted Group Membership			Total
			0 Disease Control	1 CRMO	2 Healthy
Original	Count	0 Disease Control	120	3	0	123
		1 CRMO	6	65	0	71
		2 Healthy	0	0	59	59
	%	0 Disease Control	97.561	2.43902	0	100
		1 CRMO	8.4507	91.5493	0	100
		2 Healthy	0	0	100	100
a. 96,4% of original grouped cases correctly classified.
